# Supplementary material for: Cell-free synthesis of functional phospholipase A1 from Serratia sp
Source: PubMed Central journal article supplement (PMC4966862; doi:10.1186/s13068-016-0563-5), 2016-07-29
Supplement: 13068_2016_563_MOESM2_ESM.pdf [file 13068_2016_563_MOESM2_ESM.pdf]

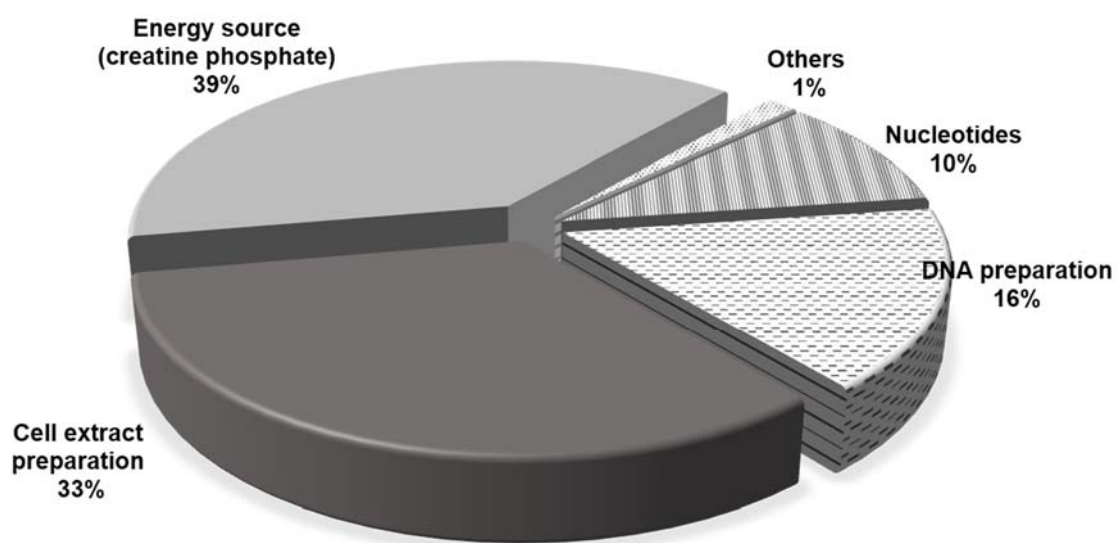

**Figure S2. Analysis of reagent cost for cell-free protein synthesis.**
